# Supplementary material for: Lagrangian advection scheme with shape matrix (LASM) v0.2: interparcel mixing, physics–dynamics coupling and 3-D extension
Source: Copernicus journal article supplement (doi:10.5194/gmd-8-2675-2015), 2015-08-27
Supplement: Supplementary file [file gmd-8-2675-2015-supplement-title-page.pdf › gmd-8-2675-2015-supplement-title-page.pdf]

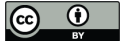

## *Supplement of*

# **Lagrangian advection scheme with shape matrix (LASM) v0.2: interparcel mixing, physics–dynamics coupling and 3-D extension**

**L. Dong et al.**

*Correspondence to:* L. Dong (dongli@lasg.iap.ac.cn)

- gmd-8-2675-2015-supplement-title-page.pdf
- \_\_MACOSX
  - .\_supplements
  - supplements
    - \* .\_lasm.barotropic.dt1800.max\_mix.mix\_coef0.01.240x121.step.gif
    - \* .\_lasm.barotropic.dt1800.mix\_coef0.01.240x121.step.gif
    - \* .\_lasm.terminator\_chemistry.360x181.gif
    - \* .\_lasm.wrf\_les.40x40x40.ogv
    - \* .\_wrf.wrf\_les.40x40x40.ogv
- supplements
  - lasm.barotropic.dt1800.max\_mix.mix\_coef0.01.240x121.step.gif
  - lasm.barotropic.dt1800.mix\_coef0.01.240x121.step.gif
  - lasm.terminator\_chemistry.360x181.gif
  - lasm.wrf\_les.40x40x40.ogv
  - wrf.wrf\_les.40x40x40.ogv

The copyright of individual parts of the supplement might differ from the CC-BY 3.0 licence.
